# Supplementary material
Source: Springer Nature journal article supplement (https://www.springermedizin.de/resource/supplementary/12936_2010_1295_MOESM1_ESM.pdf/9549436)
Supplement: MOESM1 [file 9549436]

**Fake**: Medicines active pharmaceutical ingredient (API) content, formulation, source, as well as other components are deliberately misrepresented.

**Substandard**: \_New product does not meet specified standards. Safety and or efficacy are compromised because components not at specified levels or quality.

**Non-Equivalent**: Presumption of functional equivalence is incorrect. Will not cause equivalent effect if used exactly like compound being substituted for.

**Degraded**: Known branded product distributed in ways unwarranted by brand owner. May include: expired, re-packaged, re-distributed , poorly stored. Packaging may be identical to original.
